# Supplementary material for: Simple and Efficient Targeting of Multiple Genes Through CRISPR-Cas9 in Physcomitrella patens
Source: PubMed Central journal article supplement (PMC5100863; doi:10.1534/g3.116.033266), 2016-09-08
Supplement: supp_g3.116.033266_FigureS1.pdf [file supp_g3.116.033266_FigureS1.pdf]

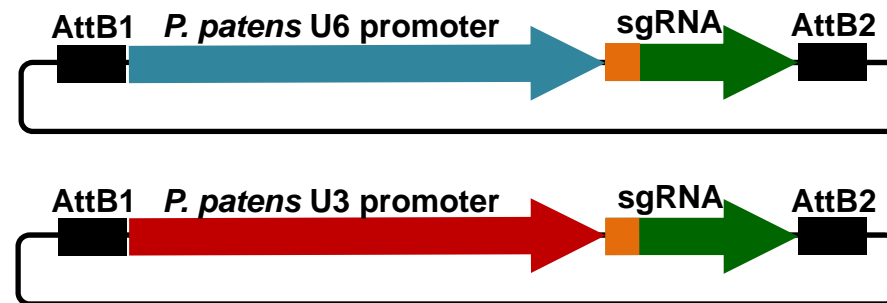

**Figure S1. Schematic representation of *P. patens* protoplast co-transformation with CRISPR-Cas9 multiplex system.**

The sgRNA is composed of a CRISPR RNA (crRNA) sequence in orange (20 nucleotides, specific for each gene) and the trans-activating crRNA (tracrRNA) sequence in green (common to all sgRNAs). AttB regions are shown in black, *P. patens* U3 promoter is shown in red and *P. patens* U6 promoter is shown in blue.
