# Supplementary material for: Simple and Efficient Targeting of Multiple Genes Through CRISPR-Cas9 in Physcomitrella patens
Source: PubMed Central journal article supplement (PMC5100863; doi:10.1534/g3.116.033266), 2016-09-08
Supplement: supp_g3.116.033266_FigureS2.pdf [file supp_g3.116.033266_FigureS2.pdf]

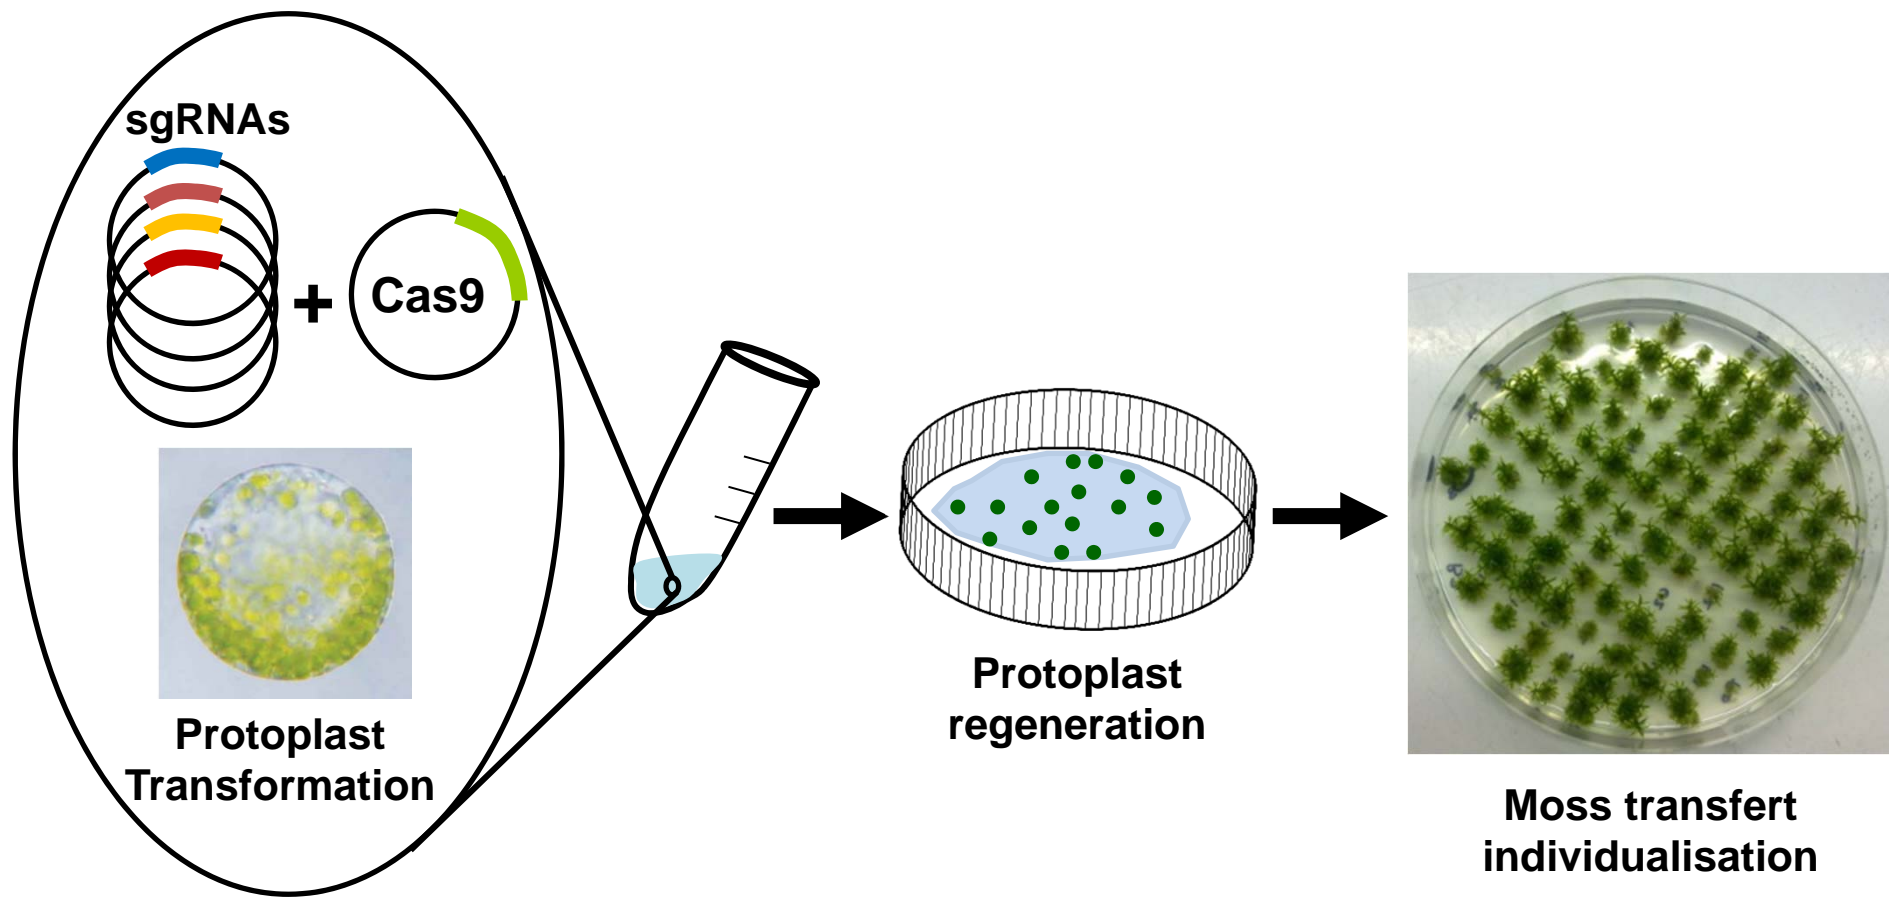

**Figure S2. Schematic representation of constructs leading to the expression of synthetic sgRNA.**
