# Supplementary material for: Simple and Efficient Targeting of Multiple Genes Through CRISPR-Cas9 in Physcomitrella patens
Source: PubMed Central journal article supplement (PMC5100863; doi:10.1534/g3.116.033266), 2016-09-08
Supplement: supp_g3.116.033266_TableS1.pdf [file supp_g3.116.033266_TableS1.pdf]

**Table S1.** Features of selected CRISPR RNA (crRNA) against members of the *PpKAI2L* gene family clade i.

| On-target gene <sup>a</sup>         | crRNA sequence and SS (%) <sup>b</sup>   | Predicted off-targets sequence <sup>b,c</sup>                       | Off-target annotation <sup>a</sup>                     |
|-------------------------------------|------------------------------------------|---------------------------------------------------------------------|--------------------------------------------------------|
| Pp3c2_19340<br>( <i>PpKAI2L-A</i> ) | GTTGTCCTCGGCCATGGTTT <u>TGG</u><br>(99)  | <u>C</u> TTG <u>A</u> CT <u>G</u> TCCATGGTTT <u>TGG</u>             | OffT1*: Intergenic between Pp3c22_8523 - Pp3c22_8540   |
|                                     |                                          | GT <u>A</u> GCCT <u>A</u> AGCCATGG <u>G</u> TT <u>TGG</u>           | OffT2*: Exon of Pp3c10_1460 (PpKAI2L-F)                |
|                                     |                                          | GT <u>A</u> GT <u>G</u> CTCAGCCATGG <u>A</u> TT <u>TGG</u>          | OffT3*: Exon of Pp3c1_18010 (PpKAI2L-K)                |
|                                     |                                          | GT <u>A</u> GCCTC <u>A</u> TCCATGG <u>G</u> TT <u>CGG</u>           | OffT4*: Exon of Pp3c19_19860                           |
|                                     |                                          | GT <u>G</u> GT <u>A</u> CT <u>A</u> GGCCATGG <u>G</u> TT <u>TGG</u> | OffT5: Exon of Pp3c12_8770 (PpKAI2L-I)                 |
|                                     |                                          | GT <u>G</u> GTCC <u>A</u> CGGCCATGG <u>C</u> G <u>TGG</u>           | OffT6: 5'UTR of Pp3c20_10270 locus                     |
|                                     |                                          | <u>I</u> TTT <u>T</u> CCCTCGGC <u>A</u> TTGGTTT <u>TGG</u>          | OffT7: Intergenic between Pp3c22_14060 - Pp3c22_14160  |
|                                     |                                          | GTTGT <u>I</u> CT <u>I</u> GGCGATGG <u>G</u> TT <u>GGG</u>          | OffT8: 3'UTR of Pp3c1_24440                            |
|                                     |                                          | GTTG <u>G</u> CCCTCGGC <u>T</u> TG <u>T</u> GT <u>CGG</u>           | OffT9: Exon of Pp3c19_4690                             |
|                                     |                                          | <u>C</u> TTGTCCTCGG <u>G</u> CCGTGG <u>C</u> TT <u>CGG</u>          | OffT10: nf                                             |
|                                     |                                          | GTTGTCCTCG <u>A</u> CGTTGGTT <u>C</u> T <u>TGG</u>                  | OffT11: Exon of Pp3c12_14550                           |
|                                     |                                          | GTTGTCCT <u>I</u> GGCTTGGTTT <u>GGG</u>                             | OffT12: Intergenic between Pp3c20_19870 - Pp3c20_19940 |
| Pp3c14_6110<br>( <i>PpKAI2L-B</i> ) | GTGTCCGGGACCGACTCTGT <u>TGG</u><br>(100) | GTGT <u>A</u> CGGGTCCGACGGT <u>G</u> T <u>CGG</u>                   | OffT1: Exon of Pp3c5_25610                             |
|                                     |                                          | GTGT <u>A</u> CGGGTCCGACGGT <u>G</u> T <u>CGG</u>                   | OffT2: Exon of Pp3c5_25430                             |
|                                     |                                          | <u>C</u> TGTCCGGT <u>A</u> CCCGCTCTGT <u>AGG</u>                    | OffT3*: Exon of Pp3c11_17570                           |
|                                     |                                          | GTGTCC <u>A</u> GGACG <u>G</u> ACA <u>C</u> T <u>TGGG</u>           | OffT4: Exon of Pp3c1_4090                              |
| Pp3c25_5350<br>( <i>PpKAI2L-C</i> ) | GCTAAAATACTCCGGGTCGGT <u>TGG</u><br>(99) | GCT <u>G</u> AAGTACTCGGGTCT <u>G</u> T <u>TGG</u>                   | OffT1*: Exon of Pp3c6_10610 (PpKAI2L-D)                |
|                                     |                                          | GCTAAAAT <u>A</u> CTCCGGATCT <u>G</u> T <u>TGG</u>                  | OffT2*: Exon of Pp3c2_19340 (PpKAI2L-A)                |
|                                     |                                          | GCCAAAAT <u>C</u> TCCG <u>I</u> GT <u>CGC</u> <u>AGG</u>            | OffT3*: Exon of Pp3c20_4150                            |
| Pp3c6_10610<br>( <i>PpKAI2L-D</i> ) | TCGGCACGGATCAATCTGT <u>TGG</u><br>(98)   | <u>T</u> GGCACAGATCAAT <u>C</u> CGT <u>G</u> T <u>TGG</u>           | OffT1*: Exon of Pp3c25_5350 (PpKAI2L-C)                |
|                                     |                                          | TCGGCACGGATCA <u>G</u> T <u>C</u> G <u>TGG</u>                      | OffT2*: Exon of Pp3c5_16420 (PpKAI2L-E)                |
|                                     |                                          | TCG <u>A</u> CA <u>T</u> GGGTCAAGCTGT <u>G</u> <u>AGG</u>           | OffT3*: Exon of Pp3c2_19340 (PpKAI2L-A)                |
|                                     |                                          | TCCGCACGGGGCAAT <u>G</u> TGT <u>G</u> <u>AGG</u>                    | OffT4: 3'UTR of Pp3c7_22220                            |
|                                     |                                          | <u>T</u> GGCACCGAC <u>C</u> AG <u>I</u> CTGT <u>G</u> T <u>TGG</u>  | OffT5: Exon of Pp3c6_29320                             |
| Pp3c5_16420<br>( <i>PpKAI2L-E</i> ) | TGGACATTCGGTGGCCGGT <u>ATGG</u><br>(99)  | TG <u>A</u> AAATTCTGTGGCCGGT <u>A</u> <u>AGA</u>                    | OffT1*: 5'UTR of Pp3c26_10400                          |
|                                     |                                          | TGGACATTCGGTGGGGGGT <u>ATGG</u>                                     | OffT2*: Exon of Pp3c16_8770                            |
|                                     |                                          | TGG <u>C</u> ATTCTGTG <u>T</u> CTGGT <u>ATGG</u>                    | OffT3*: Exon of Pp3c6_10610 (PpKAI2L-D)                |
|                                     |                                          | TGGACA <u>C</u> TCCGGT <u>C</u> AGG <u>C</u> <u>ATGG</u>            | OffT4*: Exon of Pp3c25_5350 (PpKAI2L-C)                |

<sup>a</sup>: Identifier and annotation of genomic elements from Phytozome V11 - *P. patens* genome V3.3, nf: not found,

<sup>b</sup>: Protospacer adjacent motif (PAM) sequence preceded by crRNA sequence is shown in italics and underlined. SS; Specificity score data from CRISPOR (Hsu *et al.*, 2013),

<sup>c</sup>: Mismatch of off-target sequence with respect to the crRNA sequence is shown in red,

\*Off-targets for which the activity of the sgRNA was measured by sequencing PRC fragments of the surrounding predicted site in 10 mutants.
