# Supplementary material for: Simple and Efficient Targeting of Multiple Genes Through CRISPR-Cas9 in Physcomitrella patens
Source: PubMed Central journal article supplement (PMC5100863; doi:10.1534/g3.116.033266), 2016-09-08
Supplement: supp_g3.116.033266_TableS2.pdf [file supp_g3.116.033266_TableS2.pdf]

**Table S2.** Target genes and crRNA sequences for members of the *PpKAI2L* gene family clade i.i-iii and *PpAP2/ERF* transcription factors gene family.

| On-target gene <sup>a</sup>    | crRNA sequence and SS (%) <sup>b</sup> |
|--------------------------------|----------------------------------------|
| <i>Pp3c10_1460 (PpKAI2L-F)</i> | AGACGTATTTCCACACCGTCT <u>GG</u> (99)   |
| <i>Pp3c4_32050 (PpKAI2L-J)</i> | ACGTTGTGAGCCTTCAGGTA <u>AGG</u> (100)  |
| <i>Pp3c1_18010 (PpKAI2L-K)</i> | AAGTGGCGAATTACATGGTAC <u>CGG</u> (99)  |
| <i>Pp3c3_31490</i>             | GCCAAAGAGTGGGAAACCGGT <u>GGG</u> (99)  |
| <i>Pp3c3_31500</i>             | AGTCGTCTCCTCATTCTTCA <u>CGG</u> (99)   |
| <i>Pp3c4_25130</i>             | GCAGCTGTA ACTCTACCGTC <u>AGG</u> (99)  |
| <i>Pp3c8_7340</i>              | GCTGCGATGGAGGTTAGGGC <u>AGG</u> (99)   |

<sup>a</sup>: Identifier and name (in brackets) of genes from Phytozome V11 - *P. patens* genome V3.3

<sup>b</sup>: Protospacer adjacent motif (PAM) sequence preceded by crRNA sequence is shown in italics and underlined. SS; Specificity score data from CRISPOR is shown in brackets (Hsu *et al.*, 2013)
