# Supplementary material for: Simple and Efficient Targeting of Multiple Genes Through CRISPR-Cas9 in Physcomitrella patens
Source: PubMed Central journal article supplement (PMC5100863; doi:10.1534/g3.116.033266), 2016-09-08
Supplement: supp_g3.116.033266_TableS3.pdf [file supp_g3.116.033266_TableS3.pdf]

**Table S3.** Primers used in this study.

| Name                        | 5' to 3' sequence                         |
|-----------------------------|-------------------------------------------|
| LA_sgRNA_LCoffT2-LD_offT3_F | CATCGGGATATGTCTTACTCTCC                   |
| LA_sgRNAR                   | GAGCTTATAATCATCAACGAGGTG                  |
| LB_sgRNAF                   | GTAACATTGCGCACCTTGTG                      |
| LB_sgRNAR                   | GCAAGAACCACCAGCTCTTC                      |
| LC_sgRNAF                   | GGAAACACGTCATTCTCATC                      |
| LC_sgRNAR                   | ACCTCCAGTTCGTCCAAAAT                      |
| LD_sgRNA_LCoffT1_LEoffT3F   | ATGGAGGAAGGACCAACACTCT                    |
| LD_sgRNA_LCoffT1_LEoffT3R   | AGAAGCGGGTTGGAATAGT                       |
| LE_sgRNAF                   | CTCGAGATACTCTACCCTTCACG                   |
| LE_sgRNA_LD_offT2_R         | GTACCTTGGAGAAGCCGAGA                      |
| LAoffT1_F                   | CTGCAGCACCACTAATGAA                       |
| LAoffT1_R                   | CTTTGATGCTGTATGTTACCAACC                  |
| LAoffT2_F                   | TGCAGTCCCACAATGTGATAAT                    |
| LAoffT2_R_LK_s              | TCATGATGCAAAACATCGCAAGAG                  |
| LAoffT3_F_LK_sgRNAF         | ATCTCGCGGTTTTCTGTGAT                      |
| LAoffT3_R_LK_sgRNAR         | GCAGTGCGAACTGAGTGATG                      |
| LAoffT4_F                   | GCTACCGCTTGCCAGAATAG                      |
| LAoffT4_R                   | TTCTGGAGTGCTTTGACGAA                      |
| LBoffT3_F                   | GGTTCGGGAGAAGAAGTGGT                      |
| LBoffT3_R                   | CATGTGGACGTGGTGATAGC                      |
| LBoffT4_F                   | GTGAGGTTTTGGGATCGAGTG                     |
| LBoffT4_R                   | CTTCCAGTCTTGCGACCAT                       |
| LCoffT2-LD_offT3_R          | GTAACACGCTGCGCAAATC                       |
| LCoffT3_F                   | AGTGGCGCTAGTGGTGCTAT                      |
| LCoffT3_R                   | CCGAGCTGGGCTAATAATCA                      |
| LD_offT1-LEoffT4_F          | ATGGATGAGTACCATCACTC                      |
| LD_offT1-LEoffT4_R          | TCAACAAGACTCCAGATTCCCAG                   |
| LD_offT2_F                  | GTGAGTGAGTTGGCGATGTC                      |
| LEoffT1_F                   | TACTTTGCCCTGCGTACGTT                      |
| LEoffT1_R                   | TACGCCTCAACCACACGTTA                      |
| LEoffT2_F                   | GGGTCCGGCATACTTAGCTT                      |
| LEoffT2_R                   | ATCGTTTTCAAAAACGGCAAG                     |
| LF_sgRNAF                   | GGAGATAGAACCATGCAGTCCCACAATGTGATAAT       |
| LF_sgRNAR                   | TCCACCTCCGGATCCTGATGCAAAACATCGCAAGAG      |
| LF_qR293_seq                | CAACCGATCATTCCAGACAC                      |
| LJ_sgRNAF                   | GGAGATAGAACCATGATTCAGAAATTGACACCACCTGAGAC |
| LJ_sgRNAR                   | TCCACCTCCGGATCCGGCAGCCCAGAGCAAGGC         |
| LJ_qR538_seq                | CCATCGCCTTAGGTACAAAACC                    |
| LF_OffT1F                   | GGCCTGCTAGGAAAGTAACAA                     |
| LF_OffT1R                   | CATGTGACACAAGAATGTGTGG                    |
| LF_OffT2F                   | GGCAGGTCTTTCCCTTGAAT                      |
| LF_OffT2R                   | ATGGTTCGGAGACGATCAAAA                     |
| LJ_OffT2F                   | TAACCATTGCGCAAGTAGCC                      |
| LJ_OffT2R                   | CGCAAATTCATATGTATCGTAAGC                  |
| LJ_OffT5F                   | TCCACGTATTGCCGCTTAT                       |
| LJ_OffT5R                   | AATGATTCAAACCATGCAACC                     |
| LK_OffT1F                   | ATCCTACGGCAGTCTGAACG                      |
| LK_OffT1R                   | ATTGTCGCACAATGCTCCAT                      |
| LK_OffT2F                   | AAGTTCCCATCCTCCTACATGA                    |
| LK_OffT2R                   | AACCATATCCATCATCTTTGACA                   |
| LK_OffT3F                   | AATTGCGACCTCGGTATCAG                      |
| LK_OffT3R                   | GAACCATGCATCAATCTTGC                      |
| Pp003G122800_1              | GGATCCAATCAGCCCCTTGTGT                    |
| Pp003G122800_lw             | ACGAAGGCGATGAGTGAAGT                      |
| Pp003G122900_1              | GGATCCTACAAAGGCCAGCCATC                   |
| Pp003G122900_lw             | ATACGCTCTTGACGCCATCT                      |
| Pp004G095800_7              | CCGAACCTTCACTTGGTGT                       |
| Pp004G095800_lw             | CGATTGATTGATGTGCAACG                      |
| Pp008G027400_1              | AAGCTTGGCAAGTGTGATGAGATT                  |
| Pp008G027400_lw             | AAGCTTGGCAAGTGTGATGAGATT                  |
