# Supplementary material for: Simple and Efficient Targeting of Multiple Genes Through CRISPR-Cas9 in Physcomitrella patens
Source: PubMed Central journal article supplement (PMC5100863; doi:10.1534/g3.116.033266), 2016-09-08
Supplement: supp_g3.116.033266_TableS4.pdf [file supp_g3.116.033266_TableS4.pdf]

**Table S4.** List of mutants obtained using sgRNAs against *PpKAI2L-A*, *PpKAI2L-B*, *PpKAI2L-C* and *PpKAI2L-D* clade i genes without selection.

| Mutant Name | Target gene <sup>a</sup> | Type of mutation (bp) <sup>b</sup> | Microhomology motif <sup>c</sup> |
|-------------|--------------------------|------------------------------------|----------------------------------|
| I220        | <i>PpKAI2L-A</i>         | Deletion (6)                       | TGG                              |
| I006        | <i>PpKAI2L-B</i>         | Deletion (12)                      | CTC                              |
| I022        | <i>PpKAI2L-B</i>         | Deletion (12)                      | CTC                              |
| I025        | <i>PpKAI2L-B</i>         | Deletion (12)                      | CTC                              |
| I054        | <i>PpKAI2L-B</i>         | Insertion (1)                      | nf                               |
| I122        | <i>PpKAI2L-B</i>         | Deletion (12)                      | CTC                              |
| I127        | <i>PpKAI2L-B</i>         | Deletion (12)                      | CTC                              |
| I131        | <i>PpKAI2L-B</i>         | Deletion (18)                      | TGT                              |
| I186        | <i>PpKAI2L-B</i>         | Insertion (16) and deletion (3)    | nf                               |
| I234        | <i>PpKAI2L-B</i>         | Deletion (12)                      | CTC                              |
| I246        | <i>PpKAI2L-B</i>         | Insertion (4)                      | nf                               |
| I247        | <i>PpKAI2L-B</i>         | Deletion (12)                      | CTC                              |
| I278        | <i>PpKAI2L-B</i>         | Insertion (1)                      | nf                               |
| I287        | <i>PpKAI2L-B</i>         | Deletion (12)                      | CTC                              |
| I485        | <i>PpKAI2L-B</i>         | Deletion (12)                      | CTC                              |
| I411        | <i>PpKAI2L-B</i>         | Deletion (10)                      | nf                               |
| I441        | <i>PpKAI2L-B</i>         | Insertion (4)                      | nf                               |
| I404        | <i>PpKAI2L-C</i>         | Deletion (5)                       | nf                               |
| I449        | <i>PpKAI2L-C</i>         | Deletion (5)                       | CCG                              |
| I245        | <i>PpKAI2L-A</i>         | Deletion (17)                      | nf                               |
|             | <i>PpKAI2L-B</i>         | Deletion (12)                      | CTC                              |
| I277        | <i>PpKAI2L-A</i>         | Deletion (6)                       | TGG                              |
|             | <i>PpKAI2L-B</i>         | Deletion (12)                      | CTC                              |
| I344        | <i>PpKAI2L-A</i>         | Insertion (2) and deletion (19)    | nf                               |
|             | <i>PpKAI2L-B</i>         | Insertion (4)                      | nf                               |
| I444        | <i>PpKAI2L-A</i>         | Insertion (1) and deletion (18)    | nf                               |
|             | <i>PpKAI2L-C</i>         | Deletion (4)                       | ACC                              |
| I456        | <i>PpKAI2L-A</i>         | Deletion (8)                       | nf                               |
|             | <i>PpKAI2L-C</i>         | Deletion (7)                       | ACC                              |
| I118        | <i>PpKAI2L-B</i>         | Deletion (12)                      | CTC                              |
|             | <i>PpKAI2L-C</i>         | Deletion (7)                       | ACC                              |
| I195        | <i>PpKAI2L-B</i>         | Deletion (2)                       | nf                               |
|             | <i>PpKAI2L-C</i>         | Deletion (5)                       | CCG                              |
| I266        | <i>PpKAI2L-B</i>         | Deletion (12)                      | CTC                              |
|             | <i>PpKAI2L-C</i>         | Deletion (5)                       | CCG                              |
| I297        | <i>PpKAI2L-B</i>         | Insertion (7) and deletion (2)     | nf                               |
|             | <i>PpKAI2L-C</i>         | Deletion (5)                       | CCG                              |
| I364        | <i>PpKAI2L-B</i>         | Insertion (4)                      | nf                               |
|             | <i>PpKAI2L-C</i>         | Deletion (5)                       | CCG                              |
| I385        | <i>PpKAI2L-B</i>         | Deletion (12)                      | CTC                              |
|             | <i>PpKAI2L-C</i>         | Deletion (20)                      | GAG                              |
| I389        | <i>PpKAI2L-B</i>         | Insertion (12)                     | nf                               |
|             | <i>PpKAI2L-C</i>         | Deletion (5)                       | CCG                              |
| I398        | <i>PpKAI2L-B</i>         | Deletion (12)                      | CTC                              |
|             | <i>PpKAI2L-C</i>         | Deletion (5)                       | CCG                              |
| I409        | <i>PpKAI2L-B</i>         | Deletion (12)                      | CTC                              |
|             | <i>PpKAI2L-C</i>         | Deletion (5)                       | CCG                              |
| I416        | <i>PpKAI2L-B</i>         | Insertion (1)                      | nf                               |
|             | <i>PpKAI2L-C</i>         | Deletion (4)                       | ACC                              |
| I422        | <i>PpKAI2L-B</i>         | Insertion (10)                     | nf                               |
|             | <i>PpKAI2L-C</i>         | Deletion (5)                       | CCG                              |
| I454        | <i>PpKAI2L-B</i>         | Deletion (18)                      | nf                               |
|             | <i>PpKAI2L-C</i>         | Deletion (5)                       | CCG                              |

<sup>a</sup>: Genes without mutation (WT) are not shown

<sup>b</sup>: Number of base pairs in brackets

<sup>c</sup>: nf: not found

**Table S4** Continued

| Mutant Name | Target gene <sup>a</sup> | Type of mutation (bp) <sup>b</sup> | Microhomology motif <sup>c</sup> |
|-------------|--------------------------|------------------------------------|----------------------------------|
| I465        | <i>PpKAI2L-B</i>         | Deletion (12)                      | nf                               |
|             | <i>PpKAI2L-C</i>         | Deletion (4)                       | ACC                              |
| I469        | <i>PpKAI2L-B</i>         | Deletion (12)                      | CTC                              |
|             | <i>PpKAI2L-C</i>         | Deletion (7)                       | ACC                              |
| I008        | <i>PpKAI2L-A</i>         | Insertion (1)                      | nf                               |
|             | <i>PpKAI2L-B</i>         | Insertion (1)                      | nf                               |
|             | <i>PpKAI2L-C</i>         | Deletion (5)                       | CCG                              |
| I041        | <i>PpKAI2L-A</i>         | Deletion (6)                       | TGG                              |
|             | <i>PpKAI2L-B</i>         | Deletion (18)                      | TGT                              |
|             | <i>PpKAI2L-C</i>         | Deletion (5)                       | CCG                              |
| I069        | <i>PpKAI2L-A</i>         | Insertion (2)                      | nf                               |
|             | <i>PpKAI2L-B</i>         | Insertion (10)                     | nf                               |
|             | <i>PpKAI2L-C</i>         | Deletion (5)                       | CCG                              |
| I126        | <i>PpKAI2L-A</i>         | Deletion (6)                       | TGG                              |
|             | <i>PpKAI2L-B</i>         | Insertion (1)                      | nf                               |
|             | <i>PpKAI2L-C</i>         | Deletion (5)                       | CCG                              |
| I202        | <i>PpKAI2L-A</i>         | Insertion (19)                     | nf                               |
|             | <i>PpKAI2L-B</i>         | Deletion (12)                      | CTC                              |
|             | <i>PpKAI2L-C</i>         | Deletion (5)                       | CCG                              |
| I206        | <i>PpKAI2L-A</i>         | Deletion (6)                       | TGG                              |
|             | <i>PpKAI2L-B</i>         | Deletion (12)                      | CTC                              |
|             | <i>PpKAI2L-C</i>         | Deletion (4)                       | ACC                              |
| I217        | <i>PpKAI2L-A</i>         | Insertion (2) and Deletion (5)     | nf                               |
|             | <i>PpKAI2L-B</i>         | Insertion (1)                      | nf                               |
|             | <i>PpKAI2L-C</i>         | Deletion (5)                       | CCG                              |
| I235        | <i>PpKAI2L-A</i>         | Insertion (2) and deletion (8)     | nf                               |
|             | <i>PpKAI2L-B</i>         | Insertion (8) and deletion (10)    | nf                               |
|             | <i>PpKAI2L-C</i>         | Deletion (5)                       | CCG                              |
| I289        | <i>PpKAI2L-A</i>         | Deletion (6)                       | TGG                              |
|             | <i>PpKAI2L-B</i>         | Insertion (3)                      | nf                               |
|             | <i>PpKAI2L-C</i>         | Insertion (10) and deletion (15)   | nf                               |
| I299        | <i>PpKAI2L-A</i>         | Deletion (8)                       | nf                               |
|             | <i>PpKAI2L-B</i>         | Insertion (7) and deletion (14)    | nf                               |
|             | <i>PpKAI2L-C</i>         | Deletion (7)                       | ACC                              |
| I305        | <i>PpKAI2L-A</i>         | Deletion (6)                       | TGG                              |
|             | <i>PpKAI2L-B</i>         | Deletion (12)                      | nf                               |
|             | <i>PpKAI2L-C</i>         | Deletion (9)                       | nf                               |
| I410        | <i>PpKAI2L-A</i>         | Deletion (6)                       | TGG                              |
|             | <i>PpKAI2L-B</i>         | Insertion (1)                      | nf                               |
|             | <i>PpKAI2L-C</i>         | Deletion (7)                       | ACC                              |
| I415        | <i>PpKAI2L-A</i>         | Deletion (19)                      | TT                               |
|             | <i>PpKAI2L-B</i>         | Deletion (12)                      | CTC                              |
|             | <i>PpKAI2L-C</i>         | Deletion (7)                       | ACC                              |
| I417        | <i>PpKAI2L-A</i>         | Deletion (6)                       | TGG                              |
|             | <i>PpKAI2L-B</i>         | Insertion (10)                     | nf                               |
|             | <i>PpKAI2L-C</i>         | Deletion (4)                       | ACC                              |
| I421        | <i>PpKAI2L-A</i>         | Deletion (6)                       | TGG                              |
|             | <i>PpKAI2L-B</i>         | Deletion (12)                      | CTC                              |
|             | <i>PpKAI2L-C</i>         | Deletion (4)                       | ACC                              |
| I423        | <i>PpKAI2L-A</i>         | Deletion (18)                      | GCC                              |
|             | <i>PpKAI2L-B</i>         | Deletion (12)                      | CTC                              |
|             | <i>PpKAI2L-C</i>         | Deletion (5)                       | CCG                              |
| I467        | <i>PpKAI2L-A</i>         | Deletion (3)                       | nf                               |
|             | <i>PpKAI2L-B</i>         | Deletion (12)                      | CTC                              |
|             | <i>PpKAI2L-C</i>         | Deletion (5)                       | CCG                              |

<sup>a</sup>: Genes without mutation (WT) are not shown

<sup>b</sup>: Number of base pairs in brackets

<sup>c</sup>: nf: not found

**Table S4** Continued

| Mutant Name | Target gene <sup>a</sup> | Type of mutation (bp) <sup>b</sup> | Microhomology motif <sup>c</sup> |
|-------------|--------------------------|------------------------------------|----------------------------------|
| I468        | <i>PpKAI2L-A</i>         | Deletion (8)                       | nf                               |
|             | <i>PpKAI2L-B</i>         | Insertion (30) and deletion (4)    | nf                               |
|             | <i>PpKAI2L-C</i>         | Deletion (5)                       | CCG                              |
| I482        | <i>PpKAI2L-A</i>         | Deletion (6)                       | TGG                              |
|             | <i>PpKAI2L-B</i>         | Deletion (12)                      | CTC                              |
|             | <i>PpKAI2L-C</i>         | Deletion (5)                       | CCG                              |
| I055        | <i>PpKAI2L-B</i>         | Insertion (1)                      | nf                               |
|             | <i>PpKAI2L-C</i>         | Deletion (4)                       | ACC                              |
|             | <i>PpKAI2L-D</i>         | Deletion (11)                      | nf                               |
| I448        | <i>PpKAI2L-B</i>         | Deletion (12)                      | CTC                              |
|             | <i>PpKAI2L-C</i>         | Deletion (4)                       | ACC                              |
|             | <i>PpKAI2L-D</i>         | Insertion (6) and deletion (10)    | nf                               |
| I348        | <i>PpKAI2L-A</i>         | Deletion (17)                      | nf                               |
|             | <i>PpKAI2L-B</i>         | Deletion (12)                      | CTC                              |
|             | <i>PpKAI2L-C</i>         | Deletion (6)                       | nf                               |
|             | <i>PpKAI2L-D</i>         | Insertion (28) and deletion (16)   | nf                               |
| I405        | <i>PpKAI2L-A</i>         | Deletion (6)                       | TGG                              |
|             | <i>PpKAI2L-B</i>         | Deletion (12)                      | CTC                              |
|             | <i>PpKAI2L-C</i>         | Deletion (4)                       | ACC                              |
|             | <i>PpKAI2L-D</i>         | Deletion (20)                      | nf                               |
| I442        | <i>PpKAI2L-A</i>         | Deletion (6)                       | TGG                              |
|             | <i>PpKAI2L-B</i>         | Deletion (16)                      | nf                               |
|             | <i>PpKAI2L-C</i>         | Deletion (5)                       | CCG                              |
|             | <i>PpKAI2L-D</i>         | Deletion (14)                      | TCC                              |
| I453        | <i>PpKAI2L-A</i>         | Deletion (13)                      | nf                               |
|             | <i>PpKAI2L-B</i>         | Deletion (12)                      | CTC                              |
|             | <i>PpKAI2L-C</i>         | Deletion (7)                       | ACC                              |
|             | <i>PpKAI2L-D</i>         | Deletion (7)                       | nf                               |

<sup>a</sup>: Genes without mutation (WT) are not shown

<sup>b</sup>: Number of base pairs in brackets

<sup>c</sup>: nf: not found
