# Supplementary material for: Simple and Efficient Targeting of Multiple Genes Through CRISPR-Cas9 in Physcomitrella patens
Source: PubMed Central journal article supplement (PMC5100863; doi:10.1534/g3.116.033266), 2016-09-08
Supplement: supp_g3.116.033266_TableS5.pdf [file supp_g3.116.033266_TableS5.pdf]

**Table S5.** List of mutants obtained using sgRNAs against *PpKAI2L-A*, *PpKAI2L-B*, *PpKAI2L-C*, *PpKAI2L-D* and *PpKAI2L-E* clade i genes without selection.

| Mutant Name | Target gene <sup>a</sup> | Type of mutation (bp) <sup>b</sup> | Microhomology motif <sup>c</sup> |
|-------------|--------------------------|------------------------------------|----------------------------------|
| II243       | <i>PpKAI2L-B</i>         | Deletion (12)                      | CTC                              |
| II251       | <i>PpKAI2L-B</i>         | Insertion (14)                     | nf                               |
| II353       | <i>PpKAI2L-B</i>         | Insertion (7)                      | nf                               |
| II364       | <i>PpKAI2L-B</i>         | Deletion (12)                      | CTC                              |
| II421       | <i>PpKAI2L-B</i>         | Deletion (16)                      | TGT                              |
| II478       | <i>PpKAI2L-B</i>         | Deletion (12)                      | CTC                              |
| II484       | <i>PpKAI2L-B</i>         | Insertion (4)                      | nf                               |
| II222       | <i>PpKAI2L-E</i>         | Deletion (9)                       | nf                               |
| II278       | <i>PpKAI2L-E</i>         | Deletion (35)                      | GCCGG                            |
| II328       | <i>PpKAI2L-E</i>         | Deletion (7)                       | CGGT                             |
| II230       | <i>PpKAI2L-B</i>         | Deletion (12)                      | CTC                              |
|             | <i>PpKAI2L-C</i>         | Deletion (4)                       | ACC                              |
| II502       | <i>PpKAI2L-B</i>         | Deletion (12)                      | CTC                              |
|             | <i>PpKAI2L-C</i>         | Deletion (4)                       | ACC                              |
| II023       | <i>PpKAI2L-B</i>         | Deletion (12)                      | CTC                              |
|             | <i>PpKAI2L-E</i>         | Insertion (1) and deletion (11)    | nf                               |
| II182       | <i>PpKAI2L-B</i>         | Deletion (12)                      | CTC                              |
|             | <i>PpKAI2L-E</i>         | Deletion (7)                       | CGGT                             |
| II208       | <i>PpKAI2L-B</i>         | Deletion (2)                       | nf                               |
|             | <i>PpKAI2L-E</i>         | Deletion (7)                       | CGGT                             |
| II218       | <i>PpKAI2L-B</i>         | Deletion (6)                       | nf                               |
|             | <i>PpKAI2L-E</i>         | Deletion (8)                       | nf                               |
| II257       | <i>PpKAI2L-B</i>         | Deletion (12)                      | CTC                              |
|             | <i>PpKAI2L-E</i>         | Insertion (4) and deletion (2)     | nf                               |
| II452       | <i>PpKAI2L-B</i>         | Insertion (30) and deletion (14)   | nf                               |
|             | <i>PpKAI2L-E</i>         | Deletion (1)                       | nf                               |
| II087       | <i>PpKAI2L-C</i>         | Deletion (21)                      | nf                               |
|             | <i>PpKAI2L-E</i>         | Deletion (8)                       | nf                               |
| II224       | <i>PpKAI2L-C</i>         | Deletion (5)                       | nf                               |
|             | <i>PpKAI2L-E</i>         | Deletion (9)                       | GG                               |
| II274       | <i>PpKAI2L-C</i>         | Deletion (5)                       | CCG                              |
|             | <i>PpKAI2L-E</i>         | Deletion (8)                       | nf                               |
| II333       | <i>PpKAI2L-C</i>         | Insertion (5)                      | nf                               |
|             | <i>PpKAI2L-E</i>         | Deletion (8)                       | nf                               |
| II209       | <i>PpKAI2L-B</i>         | Insertion (4)                      | nf                               |
|             | <i>PpKAI2L-C</i>         | Deletion (7)                       | ACC                              |
|             | <i>PpKAI2L-E</i>         | Deletion (9)                       | GG                               |
| II457       | <i>PpKAI2L-B</i>         | Deletion (12)                      | CTC                              |
|             | <i>PpKAI2L-C</i>         | Deletion (7)                       | ACC                              |
|             | <i>PpKAI2L-E</i>         | Insertion (5) and deletion (3)     | nf                               |
| II507       | <i>PpKAI2L-B</i>         | Deletion (12)                      | CTC                              |
|             | <i>PpKAI2L-C</i>         | Deletion (5)                       | CCG                              |
|             | <i>PpKAI2L-E</i>         | Deletion (7)                       | CGGT                             |
| II239       | <i>PpKAI2L-A</i>         | Deletion (6)                       | TGG                              |
|             | <i>PpKAI2L-B</i>         | Deletion (40)                      | nf                               |
|             | <i>PpKAI2L-C</i>         | Deletion (5)                       | CCG                              |
|             | <i>PpKAI2L-E</i>         | Deletion (28)                      | nf                               |

<sup>a</sup>: Genes without mutation (WT) are not shown

<sup>b</sup>: Number of base pairs in brackets

<sup>c</sup>: nf: not found
