# Supplementary material for: Simple and Efficient Targeting of Multiple Genes Through CRISPR-Cas9 in Physcomitrella patens
Source: PubMed Central journal article supplement (PMC5100863; doi:10.1534/g3.116.033266), 2016-09-08
Supplement: supp_g3.116.033266_TableS6.pdf [file supp_g3.116.033266_TableS6.pdf]

**Table S6.** Percentage of frameshift mutations per gene in experiments I to IV targeting *PpKAI2L* genes of clade i.

| Target gene <sup>a</sup> | Percentage of Frameshift (%FS) <sup>b</sup> |         |          |         |
|--------------------------|---------------------------------------------|---------|----------|---------|
|                          | Exp. I                                      | Exp. II | Exp. III | Exp. IV |
| <i>PpKAI2L-A</i>         | 44,82                                       | 0       | n/a      | 20      |
| <i>PpKAI2L-B</i>         | 37,93                                       | 42,10   | n/a      | 34,88   |
| <i>PpKAI2L-C</i>         | 95,34                                       | 90      | 92,85    | 91,42   |
| <i>PpKAI2L-D</i>         | 83,33                                       | nf      | 76,47    | 77,77   |
| <i>PpKAI2L-E</i>         | n/a                                         | 82,35   | 65,45    | 75      |

<sup>a</sup>: sgRNAs used to target *PpKAI2L* genes are shown in Table S1,

<sup>b</sup>: %FS = ( $\sum$  FS mutations by gene in the exp./ $\sum$  mutations by gene in the exp.) $\times$ 100

n/a: not applicable, nf= no mutant found
