# Supplementary material for: Simple and Efficient Targeting of Multiple Genes Through CRISPR-Cas9 in Physcomitrella patens
Source: PubMed Central journal article supplement (PMC5100863; doi:10.1534/g3.116.033266), 2016-09-08
Supplement: supp_g3.116.033266_TableS8.pdf [file supp_g3.116.033266_TableS8.pdf]

**Table S8.** Selected predicted off-targets against members of the *PpKAI2L* gene family clade i.i-iii for the analysis of off-target activity.

| On-target gene   | Predicted off-targets sequence <sup>a,b</sup> | Off-target annotation <sup>c</sup>   |
|------------------|-----------------------------------------------|--------------------------------------|
| <i>PpKAI2L-F</i> | AGAGGCGTTTCCACACCGTCCGG                       | OffT1*: 5' UTR of Pp3c15_18460 locus |
|                  | AAACGTATTTCCACATCCTGTGG                       | OffT2*: Exon of Pp3c16_12790         |
| <i>PpKAI2L-J</i> | ACGTTCCGAGCCCTCAGGCAAGG                       | OffT2*: 3' UTR of Pp3c15_11920 locus |
|                  | ACGTTGAGAGCCGTGATGTAGGG                       | OffT5*: Exon of Pp3c15_4920          |
| <i>PpKAI2L-K</i> | AGGTGGCCAAGTACATGGTGAGG                       | OffT1*: Exon of Pp3c5_23900          |
|                  | AAATGGAGCATTACATAGTATGG                       | OffT2*: 3' UTR of Pp3c2_2130 locus   |
|                  | AAATGGCGAAATCCATGTAGG                         | OffT3*: Exon of Pp3c15_5520          |

<sup>a</sup>: Protospacer adjacent motif (PAM) sequence preceded by crRNA sequence is shown in italics and underlined. SS; Specificity score data from CRISPOR (Hsu *et al.*, 2013),

<sup>b</sup>: Mismatch of off-target sequence with respect to the crRNA sequence is shown in red,

<sup>c</sup>: Identifier and annotation of genomic elements from Phytozome V11 - *P. patens* genome V3.3

\*Off-targets for which the activity of the sgRNA was measured by sequencing PRC fragments of the surrounding predicted site in eight mutants
